1 **Insights into molecular evolution recombination of pandemic SARS-CoV-2 using Saudi Arabian**  
2 **sequences**

3

4 Islam Nour<sup>1</sup>, Ibrahim O. Alanazi<sup>2</sup>, Atif Hanif<sup>1</sup>, Alain Kohl<sup>3</sup>, Saleh Eifan<sup>1\*</sup>

5

6 <sup>1</sup> Botany and Microbiology Department, College of Science, King Saud University, Riyadh, Saudi  
7 Arabia.

8 <sup>2</sup> National Center for Biotechnology, King Abdulaziz City for Science and Technology, Riyadh,  
9 Saudi Arabia.

10 <sup>3</sup> MRC-University of Glasgow Centre for Virus Research, Glasgow, G61 1QH, UK.

11

12 Corresponding Author: Saleh Eifan, [seifan@ksu.edu.sa](mailto:seifan@ksu.edu.sa)

13

14

15 **KEYWORDS:** SARS-CoV-2; Kingdom of Saudi Arabia; phylogenetic analysis; recombination;  
16 selection.

17

18

19 ABSTRACT

20 The recently emerged SARS-CoV-2 (*Coronaviridae; Betacoronavirus*) is the underlying cause of  
21 COVID-19 disease. Here we assessed SARS-CoV2 from the Kingdom of Saudi Arabia alongside  
22 sequences of SARS-CoV, bat SARS-like CoVs and MERS-CoV, the latter currently detected in this  
23 region. Phylogenetic analysis, natural selection investigation and genome recombination analysis  
24 were performed. Our analysis showed that all Saudi SARS-CoV-2 sequences are of the same origin  
25 and closer proximity to bat SARS-like CoVs, followed by SARS-CoVs, however quite distant to  
26 MERS-CoV. Moreover, genome recombination analysis revealed two recombination events  
27 between SARS-CoV-2 and bat SARS-like CoVs. This was further assessed by S gene recombination  
28 analysis. These recombination events may be relevant to the emergence of this novel virus.  
29 Moreover, positive selection pressure was detected between SARS-CoV-2, bat SL-CoV isolates  
30 and human SARS-CoV isolates. However, the highest positive selection occurred between SARS-  
31 CoV-2 isolates and 2 bat-SL-CoV isolates (Bat-SL-RsSHC014 and Bat-SL-CoVZC45). This further  
32 indicates that SARS-CoV-2 isolates were adaptively evolved from bat SARS-like isolates, and that  
33 a virus with originating from bats triggered this pandemic. This study thuds sheds further light on  
34 the origin of this virus.

35

36

37

38

39

40

41

42

43

#### 44 **AUTHOR SUMMARY**

45 The emergence and subsequent pandemic of SARS-CoV-2 is a unique challenge to countries all  
46 over the world, including Saudi Arabia where cases of the related MERS are still being reported.  
47 Saudi SARS-CoV-2 sequences were found to be likely of the same or similar origin. In our analysis,  
48 SARS-CoV-2 were more closely related to bat SARS-like CoVs rather than to MERS-CoV (which  
49 originated in Saudi Arabia) or SARS-CoV, confirming other phylogenetic efforts on this pathogen.  
50 Recombination and positive selection analysis further suggest that bat coronaviruses may be at  
51 the origin of SARS-CoV-2 sequences. The data shown here give hints on the origin of this virus  
52 and may inform efforts on transmissibility, host adaptation and other biological aspects of this  
53 virus.

54

#### 55 INTRODUCTION

56 A novel human pathogen called severe acute respiratory syndrome coronavirus 2 (SARS-CoV-2;  
57 *Coronaviridae*; *Betacoronavirus*) originated from Hubei, China in December 2019 and has since  
58 spread all around the world [1]. The disease was named as COVID-19 and human to human  
59 transfer has been established [2]. The disease symptoms depicted in SARS-CoV-2 infections were  
60 found similar to the infections caused by SARS coronavirus (SARS-CoV) in 2003 [3], however it  
61 would appear that the case case fatality rate is considerably lower [4]. A virus related to SARS-  
62 CoV, Middle East Respiratory syndrome coronavirus (MERS-CoV) originated from camels in the  
63 Middle East and cases are still reported by the Ministry of Health of the Kingdom of Saudi Arabia  
64 [5, 6].

65 SARS-CoV-2 is different from two zoonotic coronaviruses, SARS-CoV and MERS-CoV that caused  
66 human disease earlier in the twenty-first century. Beforehand, the *Coronaviridae* Study Group,  
67 an ICTV working group, determined each of these later two viruses prototype as a new species in  
68 new subgenera of the genus *Betacoronavirus*, *Sarbecovirus* and *Merbecovirus* [7, 8]. SARS-CoV-2

69 was assigned recently to the sarbecoviruses, a grouping that contains hundreds of known viruses  
70 predominantly isolated from humans and diverse bats [9].

71 Coronaviruses are positive sense, non-segmented, single stranded, enveloped RNA viruses with  
72 genome size of 26 kb to 32 kb identified to cause respiratory diseases in a variety of animals and  
73 humans. Human coronaviruses like SARS-CoV, MERS-CoV, and SARS-CoV-2 are pathogens of  
74 zoonotic origin [10]. Previous sequence analysis showed a high percentage of similarity among  
75 SARS-CoV-2, SARS-CoV and bat corona viruses [11, 12].

76 Coronaviruses contains mainly four types of structural and several non-structural proteins [10,  
77 13, 14]. The spike protein S is one of the structural protein plays a key role in recognition and  
78 attachment of SARS-CoV and SARS-CoV-2 to the host cell angiotensin-converting enzyme 2  
79 (ACE2) receptor [15, 16, 17]. Structurally, S is composed of two functional subunits essential for  
80 binding to the host cell receptor (S1 subunit) and virus-host cell fusion (S2 subunit) [18]. The S1  
81 subunit exists within the N-terminal 14–685 amino acids of S, including the N-terminal domain  
82 (NTD), receptor binding domain (RBD), and receptor binding motif (RBM). The S2 subunit involves  
83 fusion peptide (FP), heptad repeat 1 (HR1), heptad repeat 2 (HR2), transmembrane domain I and  
84 cytoplasmic domain (CP). Moreover, SARS-CoV-2 S protein comprises a special S1/S2 furin-  
85 detectible site, leading to potentially distinctive infectious properties (12). SARS-CoV-2 genome  
86 analysis depicted a similarity index of 79.5% with SARS-CoV and very high resemblance to bat  
87 coronaviruses, including SL-COVZC45 and RaTG13 [12, 19, 20]. Such viral sequence analysis  
88 provides important information regarding genetic characteristics and origin of viruses, and  
89 sequence-dependent data can be used for precise diagnosis of etiological agents and  
90 adaptation/support of control measures. SARS-CoV-2 dissemination has been reported globally  
91 and new infections are recorded with a fast pace in different regions of the world [21]. The  
92 growing number of infections over time may result in emergence of new variants. As such,  
93 genome sequence tracking and characterization are important to keep track of such events.  
94 SARS-CoV-2 sequences phylogenetic analyses will help us to understand the reservoir species,  
95 their potential to human transmission and evolution patterns of coronaviruses. The data  
96 generated here, where we focus on an in-depth study of SARS-CoV-2 sequences from Saudi  
97 Arabia, to further understand the history of this virus.

98 METHODS

99 **Whole genome sequences**

100 GISAID Epiflu Database has a COVID-19 dedicated page (<https://www.epicov.org/>), from where  
101 SARS-CoV-2 genomes are available. We thank the contributors of these sequences (see  
102 Acknowledgments, below). The current study intended to compare Saudi SARS-CoV-2 sequences  
103 to previously occurring MERS-CoV as well as SARS-CoV and bat-like SARS CoV sequences. Thus,  
104 the only three submitted Saudi sequences were used. In addition, a MERS-CoV sequence of Saudi  
105 origin, 7 bat SARS-COV sequences collected from 2011 to 2017 and 2 human SARS-CoV sequences  
106 were added from NCBI GenBank. Accession number, location and collection dates are shown in  
107 Table 1.

108 **Table 1. List of genomes used in phylogenetic analysis. hCoV-19 refers to SARS-CoV-2.**

| Accession No.  | Sample name                                | Abbreviated name | Data Source | Location                              | Collection date |
|----------------|--------------------------------------------|------------------|-------------|---------------------------------------|-----------------|
| EPI_ISL_416432 | hCoV-19/Saudi Arabia/KAIMRC-Alghoribi/2020 | KAIMRC-Alghoribi | GISAID      | Riyadh/Saudi Arabia                   | 3/7/2020        |
| EPI_ISL_416521 | hCoV-19/Saudi Arabia/SCDC-3321/2020        | SCDC-3321        | GISAID      | Riyadh/Saudi Arabia                   | 3/10/2020       |
| EPI_ISL_416522 | hCoV-19/Saudi Arabia/SCDC-3324/2020        | SCDC-3324        | GISAID      | Riyadh/Saudi Arabia                   | 3/10/2020       |
| MK483839       | MERS_Hu/Albaha-KSA-0800H/2018              | MERS_0800H       | NCBI        | Albaha/Saudi Arabia                   | 8/16/2018       |
| MG772933       | bat-SL-CoVZC45                             | CoVZC45          | NCBI        | Zhoushan city/Zhejiang province/China | 2/2017          |
| KF294457       | bat-SL-CoV_Longquan-140                    | Longquan-140     | NCBI        | Guizhou province/China                | 2012            |
| KY417151       | bat-SL-CoV_Rs7327                          | Rs7327           | NCBI        | Yunnan Province/China                 | 10/24/2014      |
| KY417145       | bat-SL-CoV_Rf4092                          | Rf4092           | NCBI        | Yunnan Province/China                 | 9/18/2012       |
| KY417142       | bat-SL-CoV_As6526                          | As6526           | NCBI        | Yunnan Province/China                 | 5/12/2014       |

|            |                     |          |      |                       |           |
|------------|---------------------|----------|------|-----------------------|-----------|
| KC881005   | bat-SL-CoV_RsSHC014 | RsSHC014 | NCBI | Yunnan Province/China | 4/17/2011 |
| KP886809   | bat-SL-CoV_YNLF_34C | YNLF_34C | NCBI | China                 | 5/23/2013 |
| AY278487.3 | Hu-SARS-CoV_BJ02    | BJ02     | NCBI | China                 | 6/5/2003  |
| AY278489.2 | Hu-SARS-CoV_GD01    | GD01     | NCBI | China                 | 6/5/2003  |

---

109

## 110 **Phylogenetic analysis of whole viral genomes**

111 Whole genome alignments were generated by using ClustalW with opening penalty of 15 and  
112 extension penalty of 6.66. Pairwise sequence identity and similarity from multiple sequence  
113 alignments was calculated using the server (<http://imed.med.ucm.es>) that contains the SIAS  
114 (Sequence Identity And Similarity) tool. Phylogenetic trees were constructed with Neighbor-  
115 Joining (NJ) method, Minimum Evolution (ME) method, Maximum Parsimony (MP) method, and  
116 UPGMA with 1000 bootstrap replicates (MEGA X) [22].

## 117 **Genome recombination analysis**

118 Potential recombination events in the history of the Saudi SARS-CoV-2 sequences were assessed  
119 using RDP4 [23]. RDP4 analysis was carried out based on the complete genome (nucleotide)  
120 sequence, using RDP, BootScan, GENECONV, Chimera, SISCAN, maximum chi square and 3SEQ  
121 methods. These methods are entirely used and compared in order to get consensus results. A  
122 putative recombination event was passed to consequent analysis only if it was plausibly defined  
123 by at least 3 of the above-mentioned seven algorithms [24]. The minor parent was defined as the  
124 one contributing by the smaller fraction of the obtained recombinant, whereas the major parent  
125 was that contributing by the larger fraction of the yielded recombinant [25]. Moreover, the  
126 recognized recombination events were detected with a Bonferroni corrected *P*-value cut-off of  
127 0.01. In order to avoid the possibility of false-positive results, phylogenetic analysis of the  
128 detected recombination was performed [24, 26]. In addition, the whole dataset alignment of  
129 each recognized recombinant was divided at the breakpoint positions. If 2 recombination  
130 breakpoints existed in a single sequence, the sequence region between the breakpoints was  
131 denoted the “minor” region, triggered by the minor parent, while the remaining part is called the

132 “major” region, provoked by the major parent. As a consequence, Neighbor-joining phylogenetic  
133 trees were generated to display the probable topological shifts of specific sequences.  
134 Phylogenetic discrepancy is revealed by a putative recombinant whose distance in the phylogeny  
135 is obviously close to a single parent whilst far from another for each sequence segment [27].  
136 Recombination analysis was repeated for SARS-CoV-2 S gene sequences using automated RDP  
137 analysis to investigate the presence of a recombinant that might lead to SARS-CoV-2 emergence  
138 among in SARS-CoV-2 sequences.

### 139 **Phylogenetic analysis of SARS-CoV-2 S gene sequences**

140 S gene sequences were obtained for 3 Saudi sequences from the GISAID Epiflu Database. In  
141 addition, 7 bat SARS-Like CoV sequences, 2 human SARS-CoV sequences and Saudi MERS-CoV  
142 sequence were used for alignment. This was followed by finding the best model that could be  
143 implemented when constructing the phylogenetic tree upon analysis. Models with the lowest BIC  
144 scores (Bayesian Information Criterion) are considered to depict the substitution pattern best.  
145 Moreover, AICc value (Akaike Information Criterion, corrected), Maximum Likelihood value (lnL),  
146 and the number of parameters (including branch lengths) are considered For each model [28].  
147 Non-uniformity of evolutionary rates among sites may be modeled via applying a discrete  
148 Gamma distribution (+G) with 5 rate categories and assuming that a certain fraction of sites is  
149 evolutionarily invariable (+I). Furthermore, tree topology was automatically computed to  
150 estimate ML values. This analysis involved 13 nucleotide sequences. Evolutionary analyses were  
151 conducted in MEGA X [22]. Phylogenetic analysis was performed using the NJ method based on  
152 the best fitting substitution model obtained from the previous test with bootstrap of 500  
153 replicates.

### 154 **Codon-based Z-test**

155 A codon-based test of positive selection (Z-test, MEGA X) was used to analyze the numbers of  
156 non-synonymous and synonymous substitutions per site (dN/dS ratio) in the S gene to check the  
157 probability of positive selection occurrences.

158 **Molecular clock analysis**

159 The molecular clock test was performed by comparing the ML value for the given topology  
160 obtained in the presence and absence of the molecular clock constraints under Hasegawa-  
161 Kishino-Yano model (+G+I) using MEGA X. Differences in evolutionary rates among sites were  
162 modeled using a discrete Gamma (G) distribution and allowed for invariant (I) sites to exist.

163 **RESULTS**

164 Sequence alignments of whole genomes of SARS-CoV-2, SARS-CoV, bat SARS-like CoVs and MERS-  
165 CoV showed an obvious variation in % identity that ranged from extremely high % identities of  
166 99.91-100% identity between Saudi SARS-CoV-2 sequences (suggesting same or similar origin);  
167 78.58-88.03% between Saudi SARS-CoV-2 sequences and bat SARS-like CoVs; 79.18-79.37%  
168 between Saudi SARS-CoV-2 sequences and SARS-CoVs that initiated the SARS pandemic in 2003;  
169 to relatively low % identity of 52.28-52.3% between Saudi SARS-CoV-2 sequences and Saudi  
170 MERS-CoV sequence, as shown in Table 2.



171 **Table 2. Percent identity between whole genome sequences of studied strains obtained by SIAS (Sequence Identity and Similarity)**

|                   | KAIMRC_ Alghoribi | MERS_ 0800H | CoVZC45 | Rs7327 | Rf4092 | As6526 | YNLF_ 34C | Long quan-140 | RsSHC01 4 | GD01   | BJ02   | SCDC- 3324 | SCDC- 3321 |
|-------------------|-------------------|-------------|---------|--------|--------|--------|-----------|---------------|-----------|--------|--------|------------|------------|
| KAIMRC_ Alghoribi | 100%              |             |         |        |        |        |           |               |           |        |        |            |            |
| MERS_ 0800H       | 52.28%            | 100%        |         |        |        |        |           |               |           |        |        |            |            |
| CoVZC45           | 87.88%            | 52.11%      | 100%    |        |        |        |           |               |           |        |        |            |            |
| Rs7327            | 79.15%            | 51.96%      | 80.77%  | 100%   |        |        |           |               |           |        |        |            |            |
| Rf4092            | 78.79%            | 52.35%      | 80.67%  | 94.42% | 100%   |        |           |               |           |        |        |            |            |
| As6526            | 79.26%            | 52.38%      | 81.11%  | 95.95% | 95.67% | 100%   |           |               |           |        |        |            |            |
| YNLF_ 34C         | 78.58%            | 52.29%      | 80.56%  | 92.62% | 92.98% | 93.68% | 100%      |               |           |        |        |            |            |
| Longquan-140      | 80.08%            | 52.28%      | 83.98%  | 87.21% | 87.18% | 88.69% | 87.41%    | 100%          |           |        |        |            |            |
| RsSHC014          | 79.24%            | 52.55%      | 80.86%  | 98.12% | 94.40% | 95.71% | 92.68%    | 87.27%        | 100%      |        |        |            |            |
| GD01              | 79.18%            | 52.44%      | 80.53%  | 95.57% | 93.58% | 93.64% | 93.28%    | 86.70%        | 95.25%    | 100%   |        |            |            |
| BJ02              | 79.19%            | 52.46%      | 80.58%  | 95.61% | 93.55% | 93.66% | 93.29%    | 86.73%        | 95.30%    | 99.76% | 100%   |            |            |
| SCDC-3324         | 99.91%            | 52.30%      | 88.03%  | 79.17% | 78.96% | 79.39% | 78.76%    | 80.19%        | 79.43%    | 79.35% | 79.37% | 100%       |            |
| SCDC-3321         | 99.91%            | 52.30%      | 88.03%  | 79.17% | 78.96% | 79.39% | 78.76%    | 80.19%        | 79.43%    | 79.35% | 79.37% | 100%       | 100%       |

172

173 \* hCoV-19/SA/KAI: hCoV-19/Saudi Arabia/KAIMRC-Alghoribi/2020, hCoV-19/SA/SCD: hCoV-19/Saudi Arabia/SCDC-3321/2020 and  
 174 hCoV-19/Saudi Arabia/SCDC-3324/2020 (all SARS-CoV-2), Bat-SL-CoV\_Rs7: bat-SL-CoV\_Rs7327, Bat-SL-CoV\_RsS: bat-SL-  
 175 CoV\_RsSHC014, SARS\_CoV\_GD0: Hu-SARS-CoV\_GD01, Bat-SL-CoV\_YNL: bat-SL-CoV\_YNFL\_34C, Bat-SL-CoV\_As6: bat-SL-CoV\_As6526  
 176 and MERS\_Hu/Albaha: MERS\_Hu/Albaha-KSA-0800H/2018.

177 Following whole genome alignments, phylogenetic trees were constructed with NJ, ME, UPGMA,  
178 and MP methods. The trees had similar topography with significant bootstrap support in case of  
179 NJ and ME methods. A tree containing the 3 SARS-CoV-2 Saudi isolates sequences as well as other  
180 full-length genomes for the 9 sarbecoviruses of bat and human origin and a merbecovirus, MERS-  
181 CoV. Three major clades are observed. The Saudi SARS-CoV-2 isolates form a monophyletic group  
182 that nests within a lineage of bat SL-CoVZC45 isolate. This is supported by the percent similarity  
183 between the SARS-CoV-2 isolates and bat SL-CoV45 isolate for the full-length genomes (Table 2),  
184 which are greater than 87.8%. Eight viruses, 2 human SARS-CoV isolates and 6 bat SARS-like CoV,  
185 made up a second distinct lineage and a single MERS-CoV from Abha, a third. In UPGMA, the  
186 topology was different, since the monophyletic group comprising the 3 Saudi SARS-CoV-2 isolates  
187 was diverged so that it included only 2 isolates, hCoV-19/SA/SCDC-3321 and hCoV-19/SA/SCDC-  
188 3324 (100% identity) unlike hCoV-19/SA/KAIMRC-Alghoribi of 99.91% identity to the other 2  
189 SARS-CoV-2. However, the MP method resulted in quite a different phylogenetic topology.  
190 Phylogenetic trees generated with each method are shown in Fig 1 and Fig S1. Overall,  
191 phylogenetic analysis could reveal that all Saudi viruses with available sequences are of the same  
192 or similar origin.

193

194 **Fig 1. Phylogenetic trees constructed with NJ method to infer evolutionary history using whole**  
195 **genome sequence data of 13 coronaviruses.** The bootstrap consensus tree was constructed from  
196 1000 replicates (percentage of replicate trees in which associated strains clustered together are  
197 presented at nodes) using MEGA X.

198

199 To characterize potential recombination events in the evolutionary history of the sarbecoviruses,  
200 the whole-genome sequence of Saudi SARS-CoV-2 and 9 representative coronaviruses— bat-SL-  
201 CoVZC45, bat-SL-CoV\_Longquan-140, bat-SL-CoV\_Rs7327, bat-SL-CoV\_Rf4092, bat-SL-  
202 CoV\_As6526, bat-SL-CoV\_RsSHC014, bat-SL-CoV\_YNLF\_34C, Hu-SARS-CoV\_BJ02 and Hu-SARS-  
203 CoV\_GD01 and MERS-CoV— were analysed using the Recombination Detection Program v.4  
204 (RDP4), in which seven detection methods were used to check each recombinant. MERS-CoV was  
205 added to the analysis owing to the coexistence of MERS-CoV in Saudi Arabia (where this virus

206 was first detected) and SARS-CoV-2. Two recombination events were detected between a SARS-  
207 CoV-2 (hCoV-19/Saudi Arabia/KAIMRC-Alghoribi) and SARS-like CoVs; these recombination  
208 events were also observed for the other Saudi SARS-CoV-2 isolates. The first recombination event  
209 was detected by 6 out of 7 detection methods involving RDP, GENECONV, Bootscan, MaxChi,  
210 Chimaera & 3SEQ. It included recombination breakpoints at nucleotides 22421 and 22733 which  
211 divide the genome into three regions (1-22421, 22422-22732 and 22733- 31294) (Fig 2). The  
212 major parent of the recombinant was Bat-SL-CoV\_YNL34C while the minor parent was Bat-SL-  
213 CoV\_RsSHC014 as displayed in the recombination event tree (Fig S2). The recombination rate  
214 detected was  $3.429 \times 10^{-4}$  to  $1.102 \times 10^{-15}$  substitutions per site per year at the second region,  
215 which comprises the S region. The second recombination event was detected by only 3 detection  
216 methods including RDP, Bootscan & 3SEQ. It included recombination breakpoints at 22177 and  
217 22375. The major parent of the recombinant was Bat-SL-CoV\_RsSHC014 while the minor parent  
218 was Bat-SL-CoV\_Rf4 displayed in the recombination event tree (Fig S3). The recombination rate  
219 detected was  $2.462 \times 10^{-15}$  substitutions per site per year at nucleotides 22134-22217 inside the  
220 S region (Fig 3).

221

222 **Fig 2. Recombination event 1 in Saudi SARS-CoV-2 isolates. RDP plot reveals two putative**  
223 **recombination breakpoints.** The recombination rate is shown at the top. The major and minor  
224 parents are shown under the plot.

225 \* bat-SL-CoV\_RsS: bat-SL-CoV\_RsSHC014, bat-SL-CoV\_YNLF: bat-SL-CoV\_YNLF\_34C, hCoV-  
226 19/Saudi Arabia/KAI: hCoV-19/Saudi Arabia/KAIMRC-Alghoribi/2020.

227

228 **Fig 3. Recombination event 2 in Saudi hCoV-19 isolates. RDP plot reveals two putative**  
229 **recombination breakpoints.** The recombination rate is shown at the top. The major and minor  
230 parents are shown under the plot.

231 \* bat-SL-CoV\_RsS: bat-SL-CoV\_RsSHC014, bat-SL-CoV\_Rf4: bat-SL-CoV\_Rf4092, hCoV-19/Saudi  
232 Arabia/KAI: hCoV-19/Saudi Arabia/KAIMRC-Alghoribi/2020.

233

234 Since both recombination events appeared in the S gene region, sequences of S genes of the 13  
235 CoVs were extracted for multiple alignment using ClustalW, followed by finding the best  
236 substitution model to be implemented in the phylogenetic analysis. GTR and TN93 models were  
237 the best fitting owing to achieving the least BIC of 51289.85 and 51325.49, respectively.  
238 Consequently, the phylogenetic tree was constructed using TN93 model and although, it was  
239 constructed using the NJ method (Fig 4), and the obtained tree was consistent with the tree  
240 yielded from UPMGA generated previously for the whole genome. Moreover, according to fig 4,  
241 bat-SL-CoVZC45 is the closest relative to Saudi SARS-CoV-2 isolates in terms of the S region.

242

243 Fig 4. Phylogenetic tree constructed with NJ method using S gene sequence data of the 13  
244 coronaviruses, as described previously. The bootstrap consensus tree was constructed from 500  
245 replicates using MEGA X.

246

#### 247 **Positive selection across the SARS-CoV-2 S sequence**

248 To investigate the divergence in sarbecoviruses that may have led to emergence of the novel  
249 SARS-CoV-2, positive selection pressure was examined. A codon-based Z-test for positive  
250 selection, was used to analyze the numbers of non-synonymous and synonymous substitutions  
251 per site ( $d_N/d_S$  ratio) in the S gene. The test showed that positive selection was occurring between  
252 the Saudi MERS-CoV\_0800H isolate and the bat SARS-like CoV isolates (Bat\_SL\_CoVZC45,  
253 Bat\_SL\_Rs7327 and Bat-SL\_RsSHC014) and the human SARS-CoV isolates ( $d_N/d_S=1.7384, 1.9196,$   
254  $1.7381, 1.89$  and  $1.8982$ , respectively, and  $P < 0.0424, P < 0.0286, P < 0.424, P < 0.0306$  and  $P <$   
255  $0.03$ , respectively; Table 3). However, there was no positive selection observed in the case of the  
256 SARS-CoV-2 Saudi isolates ( $P > 0.05$ ). It was proposed that the presence of MERS-CoV strain  
257 among the other isolates might have masked any positive selection imposed on SARS-CoV-2  
258 isolates owing to possessing the lowest % identity to the other isolates. Consequently, the codon-  
259 based Z-test was carried out again for all isolates except for the MERS-CoV isolate to ensure the  
260 proposed hypothesis. It was found that there was positive selection between the Saudi SARS-  
261 CoV-2 isolates, bat SL-CoV isolates and human SARS-CoV isolates ( $P < 0.05$ ). The highest positive  
262 selection was between Saudi SARS-CoV-2 isolates (hCoV-19/Saudi Arabia/SCDC-3324, hCoV-

263 19/Saudi Arabia/SCDC-3321 and hCoV-19/Saudi Arabia/KAIMRC\_Alghoribi) and 2 Bat-SL-CoV  
264 isolates (Bat-SL-RsSHC014 and Bat-SL-CoVZC45) ( $d_N/d_S = 10.6685, 10.6685, 10.8112, 10.4636,$   
265  $10.4636$  and  $10.6251$ , respectively, and  $P < 0.00001$  for all isolates; Table 4), followed by the  
266 positive selection between the Saudi SARS-CoV-2 isolates (hCoV-19/Saudi Arabia/SCDC-3324,  
267 hCoV-19/Saudi Arabia/SCDC-3321 and hCoV-19/Saudi Arabia/KAIMRC\_Alghoribi) and the 2  
268 human SARS-CoV isolates (SARS-CoV\_GD01 and SARS-CoV\_BJ02) ( $d_N/d_S = 8.6491, 8.6491, 8.7746,$   
269  $8.5216, 8.521$  and  $8.6457$ , respectively, and  $P < 0.00001$  for all isolates; Table 4). This further  
270 suggests that the SARS-CoV-2 isolates are more likely to adaptively evolved from bat SARS-like  
271 isolates.

272 **Table 3. Codon-based Z-test for positive selection<sup>a</sup> in the S gene.**

|                  | MERS_0800H | CoVZC45 | Rs7327  | Rf4092  | As6526  | YNLF_34C | Longquan-140 | RsSHC014 | SCDC-3324 | SCDC-3321 | KAIMRC_Alghoribi | GD01    | BJ02    |
|------------------|------------|---------|---------|---------|---------|----------|--------------|----------|-----------|-----------|------------------|---------|---------|
| MERS_0800H       | -          | 1.7384  | 1.9196  | 0.6528  | 1.1736  | 1.2071   | 1.3166       | 1.7381   | 1.6352    | 1.6352    | 1.609            | 1.89    | 1.8982  |
| CoVZC45          | 0.0424     | -       | -1.7074 | -3.1417 | -2.0263 | -3.373   | -2.8105      | -1.7738  | -1.0345   | -1.0345   | -1.0668          | -1.7653 | -1.85   |
| Rs7327           | 0.0286     | 1.0000  | -       | -2.3669 | -2.9642 | -2.6972  | -3.1513      | -3.4991  | -2.3472   | -2.3472   | -2.3789          | -4.1108 | -4.0906 |
| Rf4092           | 0.2576     | 1.0000  | 1.0000  | -       | -5.7237 | -4.1284  | -3.1007      | -3.0026  | -2.9567   | -2.9567   | -2.9890          | -2.9090 | -2.7205 |
| As6526           | 0.1214     | 1.0000  | 1.0000  | 1.0000  | -       | -5.2950  | -3.8800      | -3.5282  | -2.3606   | -2.3606   | -2.3925          | -3.4840 | -3.3937 |
| YNLF_34C         | 0.1149     | 1.0000  | 1.0000  | 1.0000  | 1.0000  | -        | -4.1049      | -3.6478  | -2.3801   | -2.3801   | -2.4120          | -2.5390 | -2.5217 |
| Longquan-140     | 0.0952     | 1.0000  | 1.0000  | 1.0000  | 1.0000  | 1.0000   | -            | -4.0380  | -2.1934   | -2.1934   | -2.2253          | -2.7234 | -2.7473 |
| RsSHC014         | 0.0424     | 1.0000  | 1.0000  | 1.0000  | 1.0000  | 1.0000   | 1.0000       | -        | -2.7996   | -2.7996   | -2.8313          | -4.2962 | -4.2814 |
| SCDC-3324        | 0.0523     | 1.0000  | 1.0000  | 1.0000  | 1.0000  | 1.0000   | 1.0000       | 1.0000   | -         | 0.0000    | 1.0002           | -2.1643 | -2.2197 |
| SCDC-3321        | 0.0523     | 1.0000  | 1.0000  | 1.0000  | 1.0000  | 1.0000   | 1.0000       | 1.0000   | 1.0000    | -         | 1.0002           | -2.1643 | -2.2197 |
| KAIMRC_Alghoribi | 0.0551     | 1.0000  | 1.0000  | 1.0000  | 1.0000  | 1.0000   | 1.0000       | 1.0000   | 0.1596    | 0.1596    | -                | -2.1960 | -2.2514 |
| GD01             | 0.0306     | 1.0000  | 1.0000  | 1.0000  | 1.0000  | 1.0000   | 1.0000       | 1.0000   | 1.0000    | 1.0000    | 1.0000           | -       | 0.4252  |
| BJ02             | 0.0300     | 1.0000  | 1.0000  | 1.0000  | 1.0000  | 1.0000   | 1.0000       | 1.0000   | 1.0000    | 1.0000    | 1.0000           | 0.3357  | -       |

273

274 <sup>a</sup> Probabilities (*P*) of rejecting the null hypothesis of strict neutrality ( $d_N=d_S$ ) in favor of the alternative hypothesis ( $d_N>d_S$ ) is shown  
 275 below the diagonal. Values of  $P < 0.05$  are considered significant at the 5% level and highlighted. The test statistic values are shown  
 276 above the diagonal.  $d_S$  and  $d_N$  are the numbers of synonymous and non-synonymous substitutions per site, respectively. The variance  
 277 of the difference was computed using the bootstrap method (1000 replicates).

278 \* hCoV-19/SA/KAI: hCoV-19/Saudi Arabia/KAIMRC-Alghoribi/2020, hCoV-19/SA/SCD: hCoV-19/Saudi Arabia/SCDC-3321/2020 and  
 279 hCoV-19/Saudi Arabia/SCDC-3324/2020 (all SARS-CoV-2), Bat-SL-CoV\_Rs7: bat-SL-CoV\_Rs7327, Bat-SL-CoV\_RsS: bat-SL-  
 280 CoV\_RsSHC014, SARS\_CoV\_GD0: Hu-SARS-CoV\_GD01, Bat-SL-CoV\_YNL: bat-SL-CoV\_YNLF\_34C, Bat-SL-CoV\_As6: bat-SL-CoV\_As6526  
 281 and MERS\_Hu/Albaha: MERS\_Hu/Albaha-KSA-0800H/2018

282

283

284 **Table 4. Codon-based Z-test<sup>a</sup> of all isolates except for Saudi-MERS-CoV\_0800H isolate in the S gene.**

|                         | CoVZC45 | Rs7327  | Rf4092 | As6526 | YNLF_34C | Longquan-140 | RsSHC014 | SCDC-3324 | SCDC-3321 | KAIMRC_Alghoribi | GD01    | BJ02    |
|-------------------------|---------|---------|--------|--------|----------|--------------|----------|-----------|-----------|------------------|---------|---------|
| <b>CoVZC45</b>          | -       | 11.1320 | 7.0741 | 8.3985 | 7.0397   | 8.1521       | 11.3022  | 10.4636   | 10.4636   | 10.6251          | 10.2709 | 10.1542 |
| <b>Rs7327</b>           | 0.0000  | -       | 5.5653 | 6.1583 | 7.4368   | 6.9918       | 3.3205   | 9.7945    | 9.7945    | 9.9286           | 1.0453  | 1.0675  |
| <b>Rf4092</b>           | 0.0000  | 0.0000  | -      | 2.8849 | 5.3215   | 5.6015       | 5.7809   | 6.9788    | 6.9788    | 7.0897           | 6.3999  | 6.7033  |
| <b>As6526</b>           | 0.0000  | 0.0000  | 0.0023 | -      | 5.5098   | 6.8130       | 6.2819   | 8.2467    | 8.2467    | 8.3710           | 5.3357  | 5.4916  |
| <b>YNLF_34C</b>         | 0.0000  | 0.0000  | 0.0000 | 0.0000 | -        | 6.4911       | 7.6653   | 9.6293    | 9.6293    | 9.7592           | 6.8564  | 6.8981  |
| <b>Longquan-140</b>     | 0.0000  | 0.0000  | 0.0000 | 0.0000 | 0.0000   | -            | 7.3144   | 8.2881    | 8.2881    | 8.4126           | 6.7944  | 6.7702  |
| <b>RsSHC014</b>         | 0.0000  | 0.0008  | 0.0000 | 0.0000 | 0.0000   | 0.0000       | -        | 10.6685   | 10.6685   | 10.8112          | 2.6559  | 2.6730  |
| <b>SCDC-3324</b>        | 0.0000  | 0.0000  | 0.0000 | 0.0000 | 0.0000   | 0.0000       | 0.0000   | -         | 0.0000    | -1.0008          | 8.6491  | 8.5216  |
| <b>SCDC-3321</b>        | 0.0000  | 0.0000  | 0.0000 | 0.0000 | 0.0000   | 0.0000       | 0.0000   | 1.0000    | -         | -1.0008          | 8.6491  | 8.5216  |
| <b>KAIMRC_Alghoribi</b> | 0.0000  | 0.0000  | 0.0000 | 0.0000 | 0.0000   | 0.0000       | 0.0000   | 1.0000    | 1.0000    | -                | 8.7746  | 8.6457  |
| <b>GD01</b>             | 0.0000  | 0.1490  | 0.0000 | 0.0000 | 0.0000   | 0.0000       | 0.0045   | 0.0000    | 0.0000    | 0.0000           | -       | 0.3631  |
| <b>BJ02</b>             | 0.0000  | 0.1439  | 0.0000 | 0.0000 | 0.0000   | 0.0000       | 0.0043   | 0.0000    | 0.0000    | 0.0000           | 0.3586  | -       |

285

286 <sup>a</sup> Probabilities (*P*) of rejecting the null hypothesis of strict neutrality ( $d_N=d_S$ ) in favor of the alternative hypothesis ( $d_N>d_S$ ) is shown  
287 below the diagonal. Values of  $P < 0.05$  are considered significant at the 5% level and highlighted. The test statistic values are shown  
288 above the diagonal.  $d_S$  and  $d_N$  are the numbers of synonymous and non-synonymous substitutions per site, respectively. The variance  
289 of the difference was computed using the bootstrap method (1000 replicates).

290 \* hCoV-19/SA/KAI: hCoV-19/Saudi Arabia/KAIMRC-Alghoribi/2020, hCoV-19/SA/SCD: hCoV-19/Saudi Arabia/SCDC-3321/2020 and  
291 hCoV-19/Saudi Arabia/SCDC-3324/2020 (all SARS-CoV-2), Bat-SL-CoV\_Rs7: bat-SL-CoV\_Rs7327, Bat-SL-CoV\_RsS: bat-SL-  
292 CoV\_RsSHC014, SARS\_CoV\_GD0: Hu-SARS-CoV\_GD01, Bat-SL-CoV\_YNL: bat-SL-CoV\_YNLF\_34C, Bat-SL-CoV\_As6: bat-SL-CoV\_As6526  
293 and MERS\_Hu/Albaha: MERS\_Hu/Albaha-KSA-0800H/2018.

294 Next, a molecular clock analysis was carried out using the ML method to examine if the S gene of  
295 the 13 isolates used in the current study have the same evolutionary rate throughout the tree. It  
296 was found that the strains are not evolving at similar rate indicated by rejection of the null  
297 hypothesis of equal evolutionary rate throughout the tree at a 5% significance level ( $P =$   
298 0.000E+000) as shown in Table 5.

299 **Table 5. Molecular clock analysis of S gene using the ML method.**

|                      | <b>lnL</b> | <b>Parameters</b> | <b>(+G)</b> | <b>(+I)</b> |
|----------------------|------------|-------------------|-------------|-------------|
| <b>With Clock</b>    | -27093.547 | 18                | 0.934       | 0.00        |
| <b>Without Clock</b> | -25507.677 | 29                | 0.43        | 0.00        |

300  
301 The whole genome sequences tested for recombination events using RDP revealed the presence  
302 of recombination events in the S region. S gene sequences were checked for recombination  
303 events in more details. It was found that two new recombination events have occurred among  
304 bat SARS-Like coronavirus, human SARS-CoV (that occurred during the SARS pandemic in 2003)  
305 and (SARS-CoV-2) hCoV-19/Saudi Arabia/KAIMRC-Alghoribi S genes; and both recombination  
306 events were also observed for the other Saudi SARS-Cov-2 isolates. The first recombination event  
307 was detected by 5 out of 7 detection methods involving RDP, GENECONV, Bootscan, MaxChi,  
308 SiScan & 3SEQ. It included recombination breakpoints at nucleotides 2094 and 2349 which divide  
309 the S sequence into three regions (1-2094, 2095-2348 and 2349- 4075). The major parent of the  
310 recombinant was Bat-SL-COVZC45 while the minor parent was Hu-SARS-CoV\_GD displayed in the  
311 recombination event tree (Fig S4). The recombination rate detected by RPD was  $1.855 \times 10^{-3}$   
312 substitutions per site per year at 1298-1763 region for all Saudi SARS-CoV isolates (Fig 5),  
313 however it increased to  $6.039 \times 10^{-3}$  substitutions per site per year when detected by SiScan for  
314 hCoV-19/Saudi Arabia/KAIMRC-Alghoribi as a recombinant. The second recombination event was  
315 detected by only 2 detection methods including RDP & 3SEQ and was of low quality although the  
316 same recombination rate was obtained, however the major parent in the above recombination  
317 event was replaced by bat-SL-CoV\_As6526.



318

319 **Fig 5. Recombination event in Saudi SARS-CoV-2 S sequences. RDP plot reveals two**  
320 **recombination breakpoints. The recombination rate is shown at the top. The major and minor**  
321 **parents are shown under the plot.**

322 \*Hu-SARS\_CoV\_GD: Hu-SARS-CoV\_GD01, hCoV-19/Saudi\_: hCoV-19/Saudi Arabia/KAIMRC-  
323 Alghoribi/2020, hCoV-19/Saudi Arabia/SCDC-3321/2020 and hCoV-19/Saudi Arabia/SCDC-  
324 3324/2020 (SARS-CoV-2).

325

## 326 DISCUSSION

327 Our knowledge of SARS COV-2 regarding basic and intermediate host species, evolution and  
328 genetic variation in relation to other coronaviruses like MERS-COV and SARS-COV is limited. The  
329 virus is spreading globally and with an increasing number of infections, its history and evolution  
330 needed further investigation. Typically, average evolutionary rate for coronaviruses is roughly  
331 considered as  $10^{-4}$  nucleotide substitutions per site per year [29], which agrees with the current  
332 study findings.

333 Phylogenetic analysis of SARS-CoV-2 sequences from Kingdom of Saudi Arabia depicted that they  
334 were more similar to bat coronavirus followed by human SARS-CoV, however too distant to  
335 MERS-CoV. The results of our phylogenetic analysis are partially in line with a previous study [30,  
336 31], indicative of high similarity with bat SARS-like coronavirus sequences with SARS COV-2 and  
337 suggesting that *Rhinolophus* bats may serve as common host for circulating coronavirus. It was  
338 previously reported that *Rhinolophus* bats may serve as hosts for potentially emerging viruses  
339 [32]. The MP method used for phylogenetic tree designing had a quite different phylogenetic  
340 topology from others. This could be owing to the principle of MP method in which the minimum  
341 number of evolutionary changes that interprets the whole sequence evolution (tree length) is  
342 computed for each topology, and the topology showing the smallest tree length value is chosen  
343 as the preferred tree (MP tree) [33]. Although the ME method shares a similar principle, it was  
344 mentioned elsewhere that it is closer to NJ method in defining the correct tree and that MP  
345 method is less efficient than NJ and ME methods for obtaining the most fitting and/or the correct  
346 topology [34]. Consequently, a different topology was expected although it was found in a

347 previous study, that 4 methods led to similar topologies. This may be owing to species differences  
348 since the latter was for turkey coronaviruses (group 3 viruses), however the current study was  
349 for SARS-CoV-2 virus (group 2 viruses) [35]. Therefore, the suggestion of divergence among Saudi  
350 SARS-CoV-2 isolates resulted from MP method was rejected and assumed to be of similar origin.

351 Recombination events can occur in coronaviruses [36, 37]. As per the present study,  
352 recombination analysis of the entire SARS-CoV-2 genome revealed a common isolate in both  
353 recombination events which is bat-SL-CoV\_RsSHC014, once as a minor parent and another as a  
354 major parent. Moreover, the recombination event was detected in the S region. Interestingly,  
355 RsSHC014 isolate, which is a bat coronavirus from Chinese horseshoe bats (*Rhinolophidae*) was  
356 reported to be significantly more closely related to SARS-CoV than any formerly identified bat  
357 coronaviruses, especially in the RBD of the spike protein [38]. This contradicts the findings of a  
358 recent study that didn't recognize any evidence for recombination along the entire genome of  
359 SARS-CoV-2 Wuhan isolate [12]. This could be owing to the exclusion of the significant isolate  
360 RsSHC014 for whole genome recombination analysis, that can largely limit the identification  
361 sensitivity of recombination events of SARS-CoV-2 isolates. Indeed, the exclusion of the  
362 significantly putative recombination parent AF531433 influenced the identification sensitivity of  
363 recombination events in classical swine fever virus genomes [27].

364 The current study reported two recombination events between the Saudi SARS-CoV-2 isolates  
365 and bat SARS-like CoVs, in the S region, which complements previous suggestions [39, 40]. Such  
366 events may relate to the divergence in host tropism. Since the S protein mediates both receptor  
367 binding and membrane fusion [40] and is essential for defining host tropism and transmission  
368 capacity [41], these sequences were investigated specifically. Recombination events were  
369 detected from phylogenetic analysis of S sequences and whole genome. Interestingly, MERS-CoV  
370 was found to mask the presence of any positive selection pressure among the Saudi SARS-CoV-2  
371 isolates. This could be due to the distant difference between the two lineages as well as the  
372 positive selection pressure sites. Positively selected sites for MERS-CoV are present in the region  
373 included the two heptad repeats (HR1 and HR2) and their linker in S2 domain [42], however  
374 positively selected sites are located in NTD and RBD of SARS-CoV-2 [43].

375 Examining the  $d_N/d_S$  ratios for the S gene in Saudi SARS-CoV-2 isolates showed that positive  
376 selection was occurring between viruses isolated in 2017 (bat-SL-CoVZC45, Zhoushan  
377 city/Zhejiang province/China) and 2020 (hCoV-19/Saudi Arabia/KAIMRC-Alghoribi/2020, hCoV-  
378 19/Saudi Arabia/SCDC-3321/2020 and hCoV-19/Saudi Arabia/SCDC-3324/2020, Riyadh/Saudi  
379 Arabia) and between viruses isolated in 2011 (bat-SL-CoV\_RsSHC014, Yunnan Province/China)  
380 and 2020 (hCoV-19/Saudi Arabia/KAIMRC-Alghoribi/2020, hCoV-19/Saudi Arabia/SCDC-  
381 3321/2020 and hCoV-19/Saudi Arabia/SCDC-3324/2020, Riyadh/Saudi Arabia), after the  
382 emergence of the disease in humans. Recombination analysis of S gene and of SARS-CoV-2 whole  
383 genome suggested bat SARS-like CoV as the major parental strain. Recombination analysis of S  
384 sequence added the possibility of contribution of a SARS-CoV-like sequence though this requires  
385 further examination. This finding was supported by a previous study that reported about past  
386 recombination detected in the S gene of WHCV (WH-Human 1 coronavirus referred to as ‘2019-  
387 nCoV’ of Wuhan, China), SARS-CoV and bat SARS-like CoVs including WIV1 and RsSHC014 isolates  
388 [12]. The later isolate agrees with our recombination analysis results obtained for SARS-CoV-2  
389 whole genome. However, recombination analysis of S region revealed another major parental  
390 strain which is bat-SL-CoVZC45. This isolate was reported to have a significant nucleotide identity  
391 (82.3 to 84%) with SARS-CoV-2 S sequence and is a closer relative [2, 12], and might therefore act  
392 as a closer probable ancestor to SARS-CoV-2 [44]. Moreover, the second recombination event,  
393 that considered bat-SL-CoV\_As6526 isolate as a major parent, was reported to be of low-quality  
394 owing to being below the acceptable limit (approved by 2 out of 7 algorithms; minimum approval  
395 limit is 3). This might be because of the fact that bat-SL-CoV\_As6526 isolate (Betacoronavirus  
396 Clade 2) was reported to have deletions in the RBD [45] resulting in enhanced entry using ACE-2  
397 receptor only upon protease treatment, unlike SARS-CoV-2 [46]. However, bat-SL-CoV\_As6526  
398 as a recombination contributor is still possible since SARS-CoV-2 S contains most of the contact  
399 points with human ACE2 present in clade 1 (Containing SARS-CoV some bat-SL-CoVs as SCH014),  
400 besides some amino acid variations which are distinctive to clade 2 (containing the As6526 isolate  
401 and other bat-SL-CoVs) and 3 (containing the BM48-31 isolate) [46].

402 In conclusion, our analysis of 3 Saudi SARS-2-CoV-2 and 7 representative bat SARS-like CoV, 2  
403 human SARS-CoV and MERS-CoV gives further hints about origin of this pandemic virus, in  
404 particular with regards to recombination events that underlie SARS-CoV-2 evolution.

405

#### 406 **Author contributions**

407 Conceptualization: SE, IN, IOA, AK, AH; data curation: SE; formal analysis: IN, IOA; funding  
408 acquisition: SE; investigation: IN, IOA; methodology: IN, IOA; supervision: SE; validation: IN, IOA;  
409 writing – original draft: IN, AH; writing – review & editing: IN, IOA, AH, AK, SE.

410

#### 411 **Funding information**

412 AK is supported by the UK Medical Research Council (MC\_UU\_12014/8); SE is supported by KSU  
413 Scientific Research Deanship (RGP-VPP-253).

414

#### 415 **Acknowledgements**

416 We gratefully acknowledge the authors, originating and submitting laboratories of the sequences from  
417 GISAID's EpiFlu™ Database on which this research is based. The list is detailed below.

| Isolate ID     | Country      | Collection date | Isolate name                               | Originating Laboratory              | Submitting Laboratory                                                                                | Authors                                                                                                |
|----------------|--------------|-----------------|--------------------------------------------|-------------------------------------|------------------------------------------------------------------------------------------------------|--------------------------------------------------------------------------------------------------------|
| EPI_ISL_416521 | Saudi Arabia | 2020-03-10      | hCoV-19/Saudi Arabia/SCDC-3321/2020        | Public Health Laboratory            | Public Health Laboratory, Saudi CDC                                                                  | Albarrag, A                                                                                            |
| EPI_ISL_416522 | Saudi Arabia | 2020-03-10      | hCoV-19/Saudi Arabia/SCDC-3324/2020        | Public Health Laboratory, Saudi CDC | Public Health Laboratory, Saudi CDC                                                                  | Albarrag, A                                                                                            |
| EPI_ISL_416432 | Saudi Arabia | 2020-03-07      | hCoV-19/Saudi Arabia/KAIMRC-Alghoribi/2020 | Clinical Microbiology Lab           | Infectious Disease Research Department, King Abdullah International Medical Research Center (KAIMRC) | Majed Alghoribi, Sadeem Alhayli, Abdulrahman Alswaji, Liliane Okdah, Sameera Al Johani, Michel Doumith |

418

419 REFERENCES

- 420 1. Wang C, Horby PW, Hayden FG, Gao GF. A novel coronavirus outbreak of global health  
421 concern. *Lancet*. 2020.
- 422 2. Chan JFW, Yuan S, Kok KH, et al. A familial cluster of pneumonia associated with the 2019  
423 novel coronavirus indicating person-to-person transmission: a study of a family cluster.  
424 *Lancet* 2020; published online Jan 24. [https://doi.org/10.1016/S0140-6736\(20\)30154-9](https://doi.org/10.1016/S0140-6736(20)30154-9).
- 425 3. Peiris JS, Guan Y, Yuen KY. Severe acute respiratory syndrome. *Nat Med* 2004; 10 (suppl 12):  
426 S88–97.
- 427 4. Mahase, E. (2020). Coronavirus: covid-19 has killed more people than SARS and MERS  
428 combined, despite lower case fatality rate.
- 429 5. Alagaili AN, Briese T, Mishra N, et al. Middle East respiratory syndrome coronavirus infection  
430 in dromedary camels in Saudi Arabia. *mBio* 2014; 5: e00884-14.
- 431 6. Cotten M, Watson SJ, Kellam P, Al-Rabeeh AA, Makhdoom HQ, Assiri A, et al. Transmission  
432 and evolution of the Middle East respiratory syndrome coronavirus in Saudi Arabia: a  
433 descriptive genomic study. *Lancet (London, England)*. 2013;382(9909):1993-2002.
- 434 7. de Groot RJ, Baker SC, Baric RS, Brown CS, Drosten C, Enjuanes L, Fouchier RA, Galiano M,  
435 Gorbalenya AE, Memish ZA, Perlman S. Commentary: Middle East respiratory syndrome  
436 coronavirus (MERS-CoV): announcement of the Coronavirus Study Group. *Journal of*  
437 *virology*. 2013 Jul 15;87(14):7790-2.
- 438 8. Gorbalenya AE, Snijder EJ, Spaan WJ. Severe acute respiratory syndrome coronavirus  
439 phylogeny: toward consensus. *Journal of virology*. 2004 Aug 1;78(15):7863-6.
- 440 9. Gorbalenya AE, Baker SC, Baric RS, Groot RJ, Gulyaeva AA, Haagmans BL. The species Severe  
441 acute respiratory syndrome-related coronavirus: classifying 2019-nCoV and naming it SARS-  
442 CoV-2, *Nat Microbiol*. 2020 Mar 2:1.
- 443 10. Chen Y, Liu Q, Guo D. Emerging coronaviruses: genome structure, replication, and  
444 pathogenesis. *J Med Virol* 2020;92:418e23.
- 445 11. Lu R, Zhao X, Li J, Niu P, Yang B, Wu H, et al. Genomic characterisation and epidemiology of  
446 2019 novel coronavirus: implications for virus origins and receptor binding. *Lancet*  
447 2020;395:565e74.

- 448 12. Wu F, Zhao S, Yu B, Chen YM, Wang W, Song ZG, Hu Y, Tao ZW, Tian JH, Pei YY, Yuan ML. A  
449 new coronavirus associated with human respiratory disease in China. *Nature*. 2020  
450 Mar;579(7798):265-9.
- 451 13. de Wilde AH, Snijder EJ, Kikkert M, van Hemert MJ. Host factors in coronavirus replication.  
452 In *Roles of Host Gene and Non-coding RNA Expression in Virus Infection 2017* (pp. 1-42).  
453 Springer, Cham.
- 454 14. Cui J, Li F, Shi ZL. Origin and evolution of pathogenic coronaviruses. *Nature reviews*  
455 *Microbiology*. 2019 Mar;17(3):181-92.
- 456 15. Monteil V, Kwon H, Prado P, Hagelkrüys A, Wimmer RA, Stahl M, Leopoldi A, Garreta E, del  
457 Pozo CH, Prosper F, Romero JP. Inhibition of SARS-CoV-2 infections in engineered human  
458 tissues using clinical-grade soluble human ACE2. *Cell*. 2020 Apr 24. In press.
- 459 16. Donnelly CA, Fisher MC, Fraser C, Ghani AC, Riley S, Ferguson NM, et al. Epidemiological and  
460 genetic analysis of severe acute respiratory syndrome. *Lancet Infect Dis* 2004;4:672e83.
- 461 17. Li R, Qiao S, Zhang G. Analysis of angiotensin-converting enzyme 2 (ACE2) from different  
462 species sheds some light on cross-species receptor usage of a novel coronavirus 2019-nCoV.  
463 *J Infect* 2020. <https://doi.org/10.1016/j.jinf.2020.02.013>. online ahead of print
- 464 18. Xia S, Liu M, Wang C, Xu W, Lan Q, Feng S, Qi F, Bao L, Du L, Liu S, Qin C. Inhibition of SARS-  
465 CoV-2 (previously 2019-nCoV) infection by a highly potent pan-coronavirus fusion inhibitor  
466 targeting its spike protein that harbors a high capacity to mediate membrane fusion. *Cell*  
467 *research*. 2020 Mar 30:1-3.
- 468 19. Zhou P, Yang XL, Wang XG, Hu B, Zhang L, Zhang W, Si HR, Zhu Y, Li B, Huang CL, Chen HD. A  
469 pneumonia outbreak associated with a new coronavirus of probable bat origin. *Nature*. 2020  
470 Mar;579(7798):270-3.
- 471 20. Zhang T, Wu Q, Zhang Z. Probable pangolin origin of SARS-CoV-2 associated with the COVID-  
472 19 outbreak. *Current Biology*. 2020 Mar 19.
- 473 21. He Feng, Deng Yu, Li Weina. Coronavirus Disease 2019 (COVID-19): what we know? *J Med*  
474 *Virol*. 2020. <https://doi.org/10.1002/jmv.2576>

- 475 22. Kumar S, Stecher G, Li M, Knyaz C, Tamura K. MEGA X: molecular evolutionary genetics  
476 analysis across computing platforms. *Molecular biology and evolution*. 2018 Jun  
477 1;35(6):1547-9.
- 478 23. Martin DP, Murrell B, Golden M, Khoosal A, Muhire B. RDP4: Detection and analysis of  
479 recombination patterns in virus genomes. *Virus evolution*. 2015 Mar 1;1(1).
- 480 24. Liu X, Wu C, Chen AY. Codon usage bias and recombination events for neuraminidase and  
481 hemagglutinin genes in Chinese isolates of influenza A virus subtype H9N2. *Archives of*  
482 *virology*. 2010 May 1;155(5):685-93.
- 483 25. Martin DP, Posada D, Crandall KA, Williamson C. A modified bootscan algorithm for  
484 automated identification of recombinant sequences and recombination breakpoints. *AIDS*  
485 *Research & Human Retroviruses*. 2005 Jan 1;21(1):98-102.
- 486 26. Boni MF, Zhou Y, Taubenberger JK, Holmes EC. Homologous recombination is very rare or  
487 absent in human influenza A virus. *Journal of virology*. 2008 May 15;82(10):4807-11.
- 488 27. Chen Y, Chen YF. Extensive homologous recombination in classical swine fever virus: a re-  
489 evaluation of homologous recombination events in the strain AF407339. *Saudi journal of*  
490 *biological sciences*. 2014 Sep 1;21(4):311-6.
- 491 28. Nei M. and Kumar S. (2000). *Molecular Evolution and Phylogenetics*. Oxford University Press,  
492 New York.
- 493 29. Salemi M, Fitch WM, Ciccozzi M, et al. SARS-CoV sequence characteristics and evolutionary  
494 rate estimate from maximum likelihood analysis. *J Virol*. 2004;78:1602–1603.
- 495 30. Zhou P, Yang X-L, Wang X-G, et al. Discovery of a novel coronavirus associated with the  
496 recent pneumonia outbreak in humans and its potential bat origin. *bioRxiv* 2020; published  
497 online Jan 23. DOI:10.1101/2020.01.22.914952.
- 498 31. Benvenuto D, Giovanetti M, Salemi M, Prosperi M, De Flora C, Junior Alcantara LC, Angeletti  
499 S, Ciccozzi M. The global spread of 2019-nCoV: a molecular evolutionary analysis. *Pathogens*  
500 *and Global Health*. 2020 Feb 12:1-4.
- 501 32. Andersen KG, Rambaut A, Lipkin WI, Holmes EC, Garry RF. The proximal origin of SARS-CoV-  
502 2. *Nature medicine*. 2020 Apr;26(4):450-2.



- 503 33. Takahashi K, Nei M. Efficiencies of fast algorithms of phylogenetic inference under the  
504 criteria of maximum parsimony, minimum evolution, and maximum likelihood when a large  
505 number of sequences are used. *Molecular Biology and Evolution*. 2000 Aug 1;17(8):1251-8.
- 506 34. Saitou N, Imanishi T. Relative efficiencies of the Fitch-Margoliash, maximum-parsimony,  
507 maximum-likelihood, minimum-evolution, and neighbor-joining methods of phylogenetic  
508 tree construction in obtaining the correct tree. 1989: 514.
- 509 35. Jackwood MW, Boynton TO, Hilt DA, McKinley ET, Kissinger JC, Paterson AH, Robertson J,  
510 Lemke C, McCall AW, Williams SM, Jackwood JW. Emergence of a group 3 coronavirus  
511 through recombination. *Virology*. 2010 Mar 1;398(1):98-108.
- 512 36. Su S, Wong G, Shi W, Liu J, Lai AC, Zhou J, Liu W, Bi Y, Gao GF. Epidemiology, genetic  
513 recombination, and pathogenesis of coronaviruses. *Trends in microbiology*. 2016 Jun  
514 1;24(6):490-502.
- 515 37. Lyons DM, Luring AS. Evidence for the Selective Basis of Transition-to-Transversion  
516 Substitution Bias in Two RNA Viruses. *Mol Biol Evol*. 2017;34(12):3205-15.
- 517 38. Ge XY, Li JL, Yang XL, Chmura AA, Zhu G, Epstein JH, Mazet JK, Hu B, Zhang W, Peng C, Zhang  
518 YJ. Isolation and characterization of a bat SARS-like coronavirus that uses the ACE2 receptor.  
519 *Nature*. 2013 Nov;503(7477):535-8.
- 520 39. Li X, Giorgi EE, Marichann MH, Foley B, Xiao C, Kong XP, Chen Y, Korber B, Gao F. Emergence  
521 of SARS-CoV-2 through Recombination and Strong Purifying Selection. *bioRxiv*. 2020 Jan 1.
- 522 40. Li F. Structure, function, and evolution of coronavirus spike proteins. *Annu Rev Virol* 2016;  
523 3: 237–61.
- 524 41. Lu G, Wang Q, Gao GF. Bat-to-human: spike features determining ‘host jump’ of  
525 coronaviruses SARS-CoV, MERS-CoV, and beyond. *Trends Microbiol* 2015; 23: 468–78.
- 526 42. Forni D, Filippi G, Cagliani R, De Gioia L, Pozzoli U, Al-Daghri N, Clerici M, Sironi M. The heptad  
527 repeat region is a major selection target in MERS-CoV and related coronaviruses. *Scientific*  
528 *reports*. 2015 Sep 25;5:14480.
- 529 43. Tagliamonte MS, Adid N, Chillemi G, Salemi M, Mavian CN. Re-insights into origin and  
530 adaptation of SARS-CoV-2. *bioRxiv*. 2020 Jan 1.



531 44. Zhang L, Shen FM, Chen F, Lin Z. Origin and evolution of the 2019 novel coronavirus. Clinical  
532 Infectious Diseases. 2020 Feb 3.

533 45. Hu B, Zeng LP, Yang XL, Ge XY, Zhang W, Li B, Xie JZ, Shen XR, Zhang YZ, Wang N, Luo DS.  
534 Discovery of a rich gene pool of bat SARS-related coronaviruses provides new insights into  
535 the origin of SARS coronavirus. PLoS pathogens. 2017 Nov;13(11).

536 46. Letko M, Marzi A, Munster V. Functional assessment of cell entry and receptor usage for  
537 SARS-CoV-2 and other lineage B betacoronaviruses. Nature microbiology. 2020  
538 Apr;5(4):562-9.

539

#### 540 SUPPORTING INFORMATION

541 **Fig S1. Phylogenetic trees constructed with (A) ME, (B) UPGMA and (C) MP methods to infer**  
542 **evolutionary history using whole genome sequence data of 13 coronaviruses.** The bootstrap  
543 consensus tree was constructed from 1000 replicates (percentage of replicate trees in which  
544 associated strains clustered together are presented at nodes) using MEGA X.

545

546 **Fig S2. Phylogenetic tree of recombination event 1 in Saudi SARS-CoV-2 isolates. (A)**  
547 **Phylogenies of the major parental region (1-22421 and 22733-31294) and (B) minor parental**  
548 **region (22422 - 22732). Phylogenies were estimated using UPGMA. The scale bar represents**  
549 **the number of substitutions per site.**

550 \* hCoV-19/SA/KAI: hCoV-19/Saudi Arabia/KAIMRC-Alghoribi/2020, hCoV-19/SA/SCD: hCoV-  
551 19/Saudi Arabia/SCDC-3321/2020 and hCoV-19/Saudi Arabia/SCDC-3324/2020 (all SARS-CoV-2),  
552 Bat-SL-CoV\_Rs7: bat-SL-CoV\_Rs7327, Bat-SL-CoV\_RsS: bat-SL-CoV\_RsSHC014, SARS\_CoV\_GD0:  
553 Hu-SARS-CoV\_GD01, Bat-SL-CoV\_YNL: bat-SL-CoV\_YNLF\_34C, Bat-SL-CoV\_As6: bat-SL-  
554 CoV\_As6526 and MERS\_Hu/Albaha: MERS\_Hu/Albaha-KSA-0800H/2018.

555

556 **Fig S3. Phylogenetic tree of recombination event 2 in Saudi hCoV-19 isolates. (A) Phylogenies**  
557 **of the major parental region (1-22177 and 22375-31294) and (B) minor parental region (22178-**  
558 **22374). Phylogenies were estimated using UPGMA. The scale bar represents the number of**  
559 **substitutions per site.**

560 \* hCoV-19/SA/KAI: hCoV-19/Saudi Arabia/KAIMRC-Alghoribi/2020, hCoV-19/SA/SCD: hCoV-  
561 19/Saudi Arabia/SCDC-3321/2020 and hCoV-19/Saudi Arabia/SCDC-3324/2020 (SARS-CoV-2),  
562 Bat-SL-CoV\_Rs7: bat-SL-CoV\_Rs7327, Bat-SL-CoV\_RsS: bat-SL-CoV\_RsSHC014, SARS\_CoV\_GD0:

563 Hu-SARS-CoV\_GD01, Bat-SL-CoV\_YNL: bat-SL-CoV\_YNLF\_34C, Bat-SL-CoV\_As6: bat-SL-  
564 CoV\_As6526 and MERS\_Hu/Albaha: MERS\_Hu/Albaha-KSA-0800H/2018.

565

566 **Fig S4. Phylogenetic tree of recombination event in Saudi SARS-CoV-2 S sequences. (A)**  
567 **Phylogenies of the major parental region (1-2094 and 2349- 4075) and (B) minor parental**  
568 **region (2095-2348). Phylogenies were estimated using UPGMA. The scale bar represents the**  
569 **number of substitutions per site.**

570 \* MERS\_Hu/Albaha: MERS\_Hu/Albaha-KSA-0800H/2018, Bat-SL-CoV\_Rs7: bat-SL-CoV\_Rs7327,  
571 Bat-SL-CoV\_RsS: bat-SL-CoV\_RsSHC014, Hu-SARS\_CoV\_GD: Hu-SARS-CoV\_GD01, Hu-  
572 SARS\_CoV\_BJ: Hu-SARS-CoV\_BJ02, Bat-SL-CoV\_As6: bat-SL-CoV\_As6526, bat-SL-CoV\_Lon: bat-  
573 SL-CoV\_Longquan-140, Bat-SL-CoV\_YNL: bat-SL-CoV\_YNLF\_34C, hCoV-19/Saudi\_: hCoV-  
574 19/Saudi Arabia/KAIMRC-Alghoribi/2020, hCoV-19/Saudi Arabia/SCDC-3321/2020 and hCoV-  
575 19/Saudi Arabia/SCDC-3324/2020 (SARS-CoV-2).

bioRxiv preprint doi: <https://doi.org/10.1101/2020.05.13.093971>; this version posted May 14, 2020. The copyright holder for this preprint (which was not certified by peer review) is the author/funder, who has granted bioRxiv a license to display the preprint in perpetuity. It is made available under aCC-BY 4.0 International license.

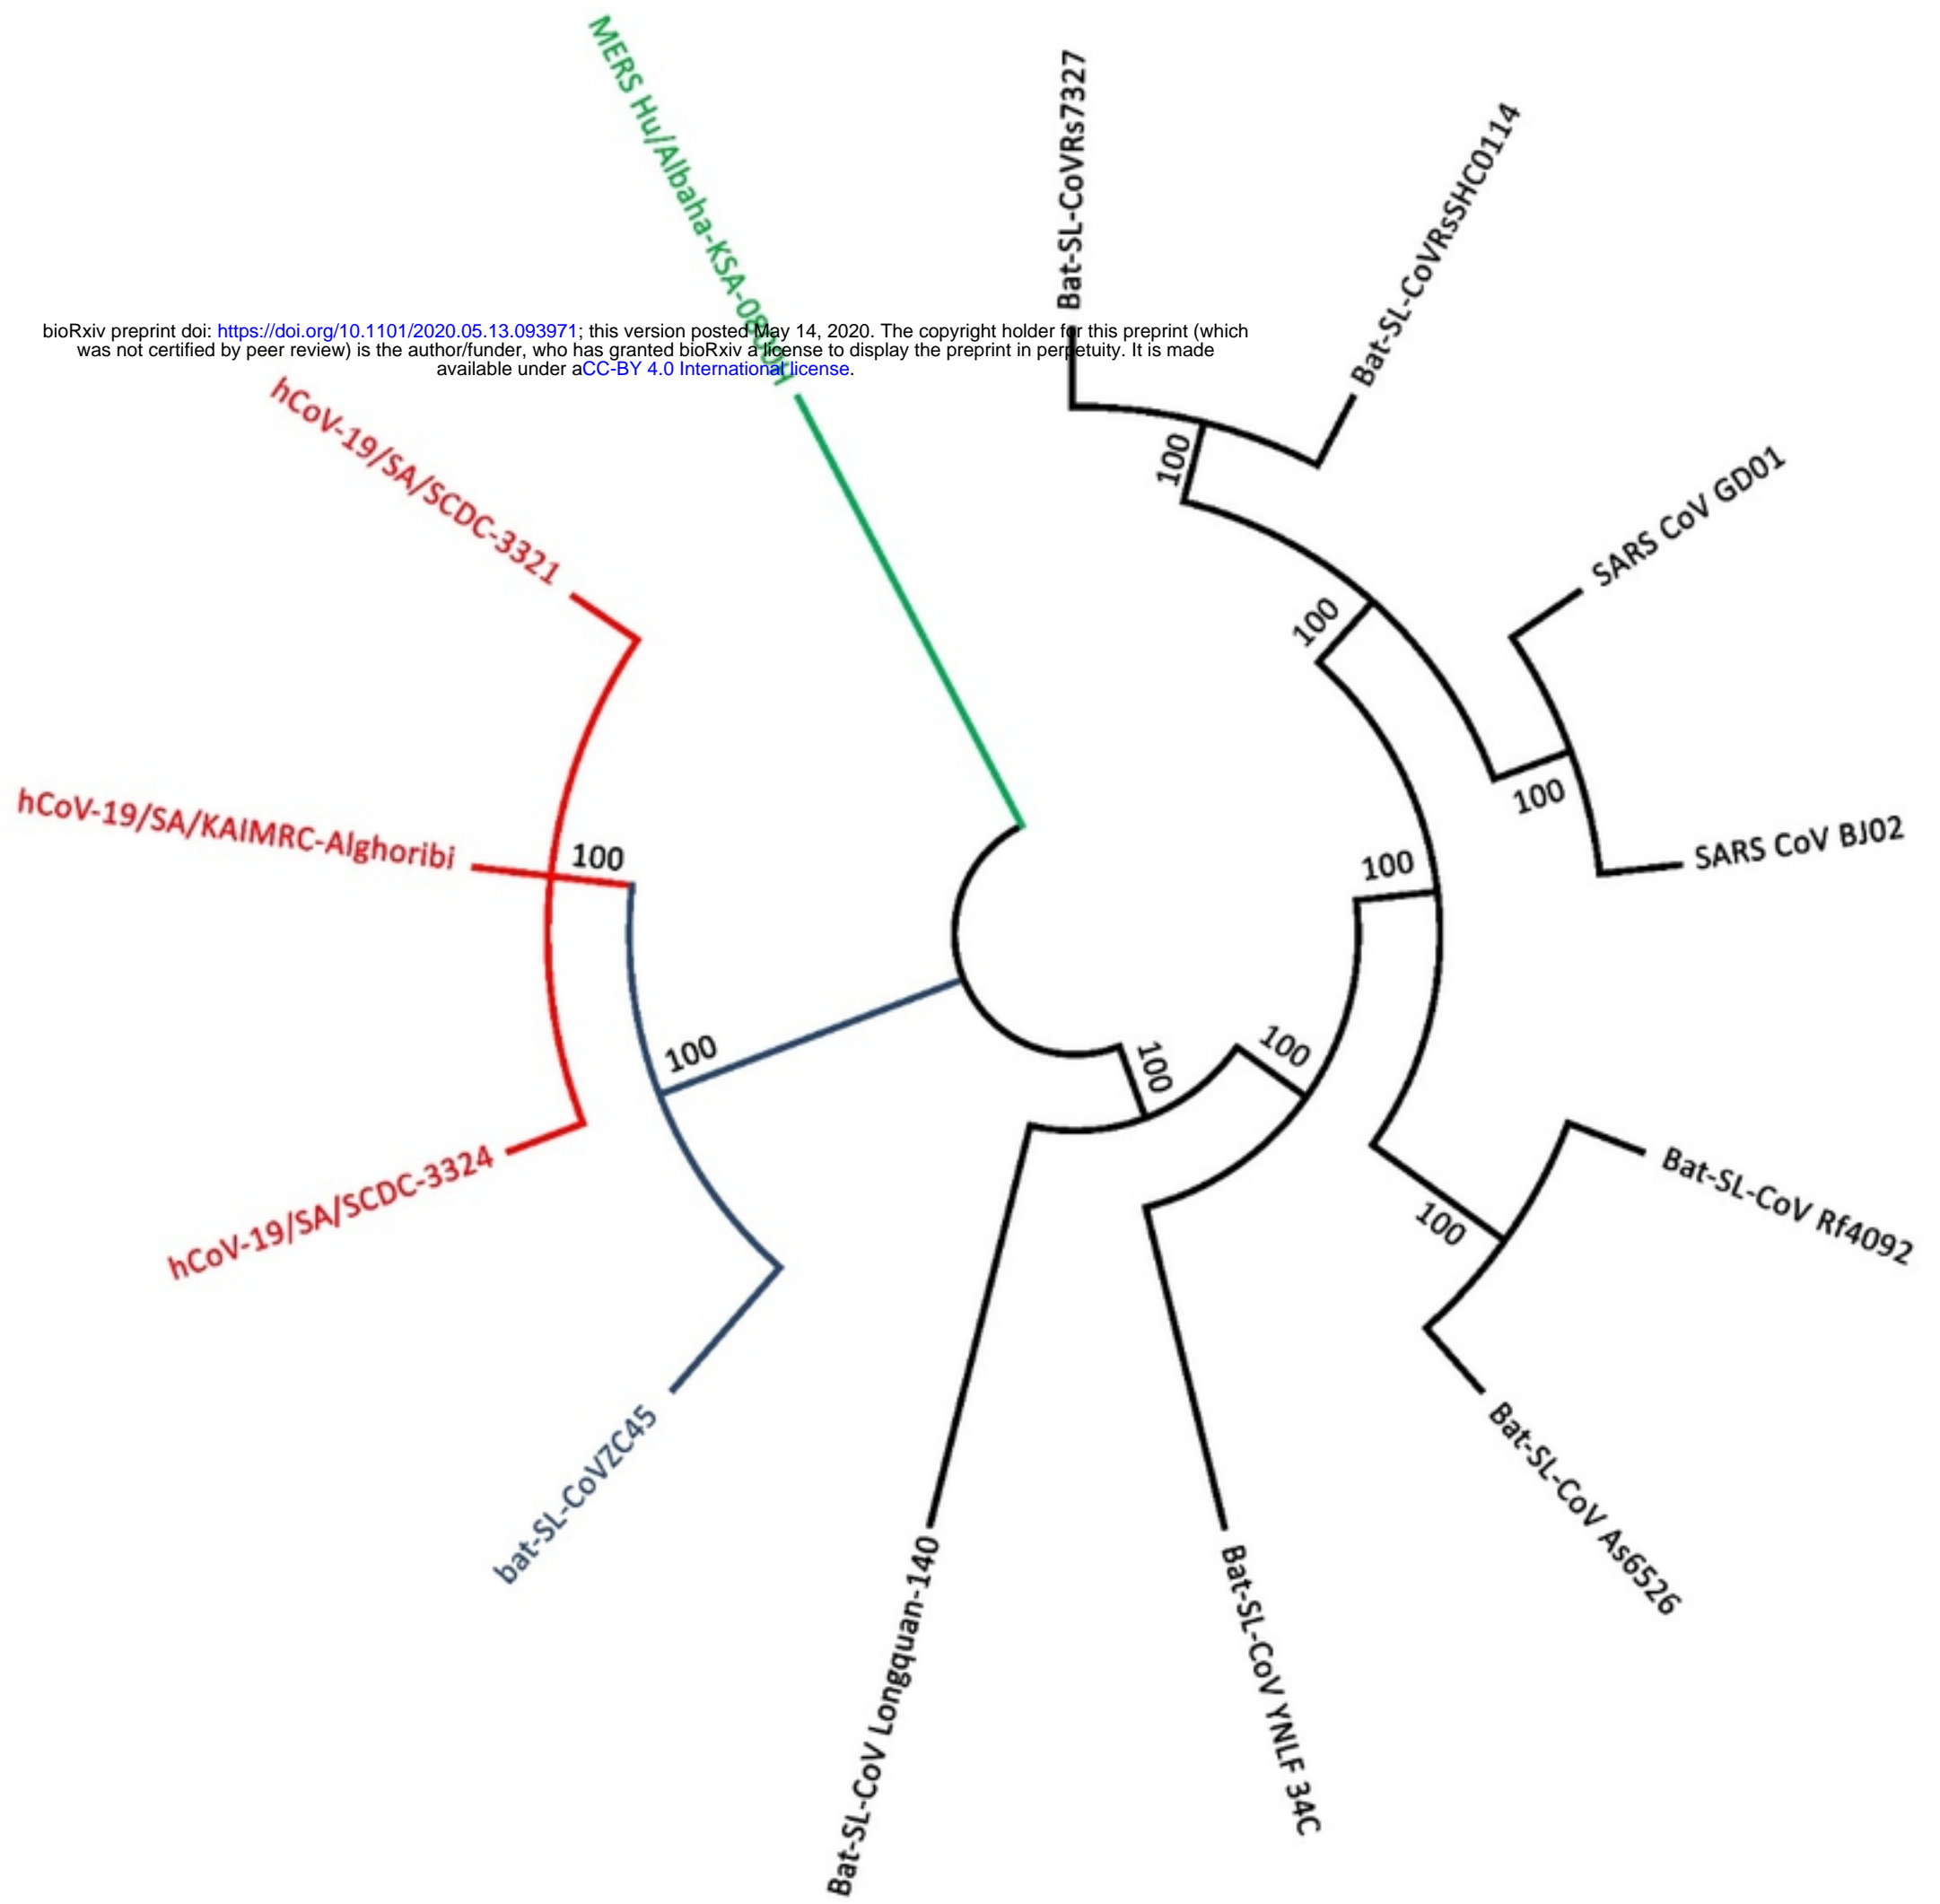

Fig 1

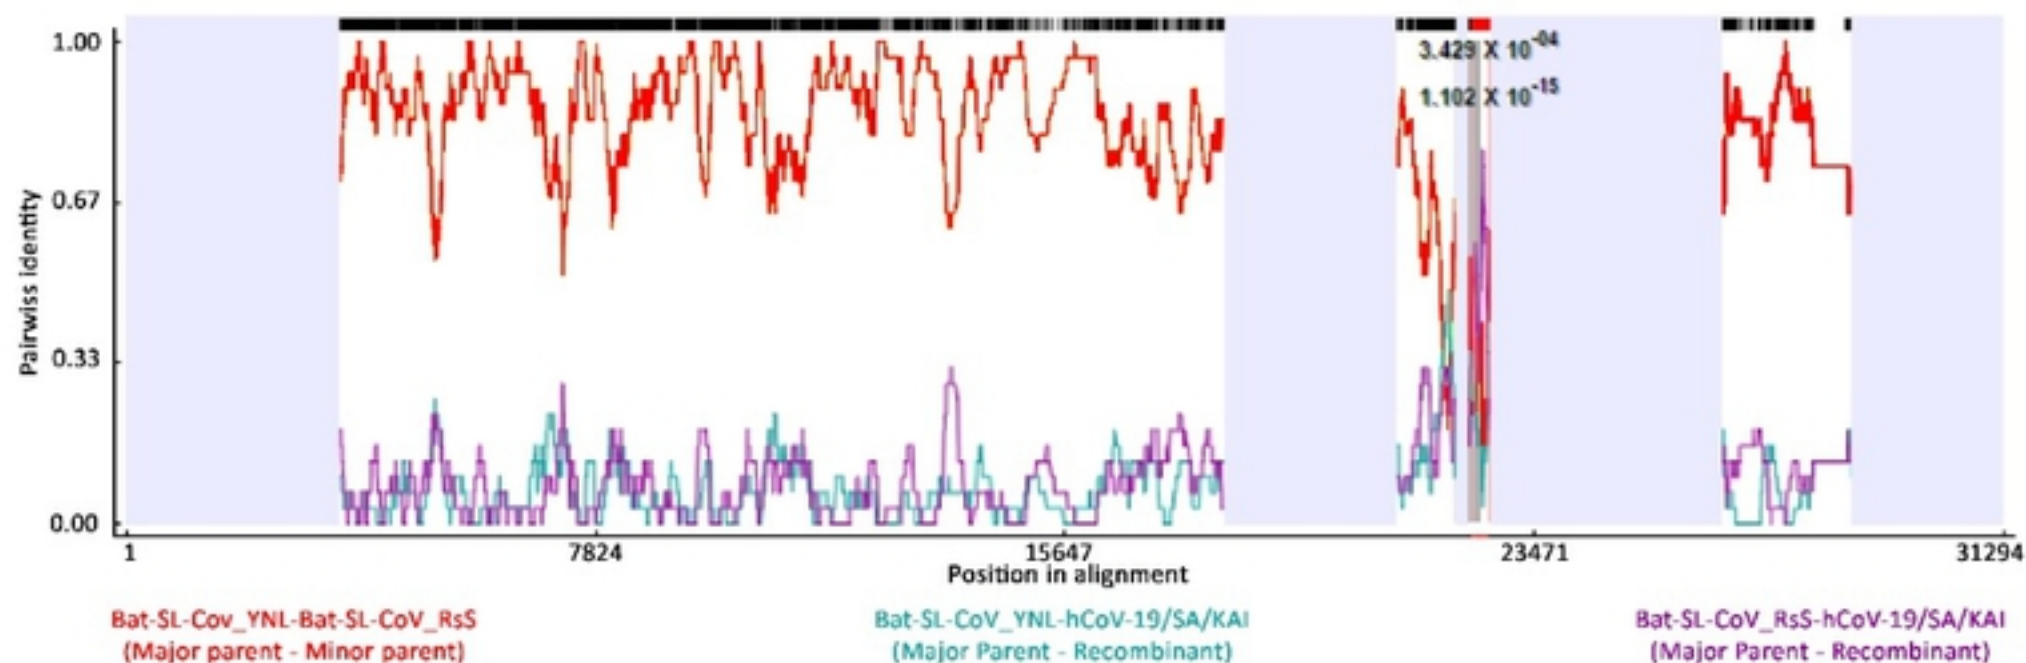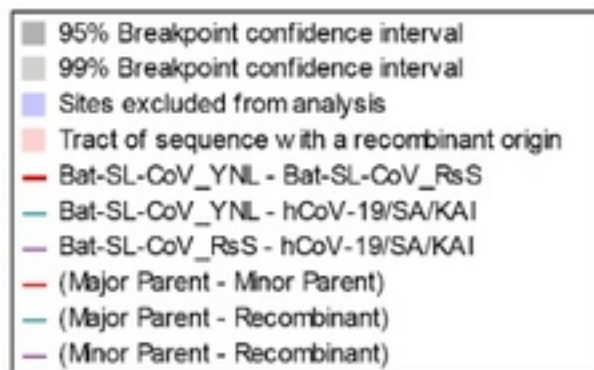

Fig 2

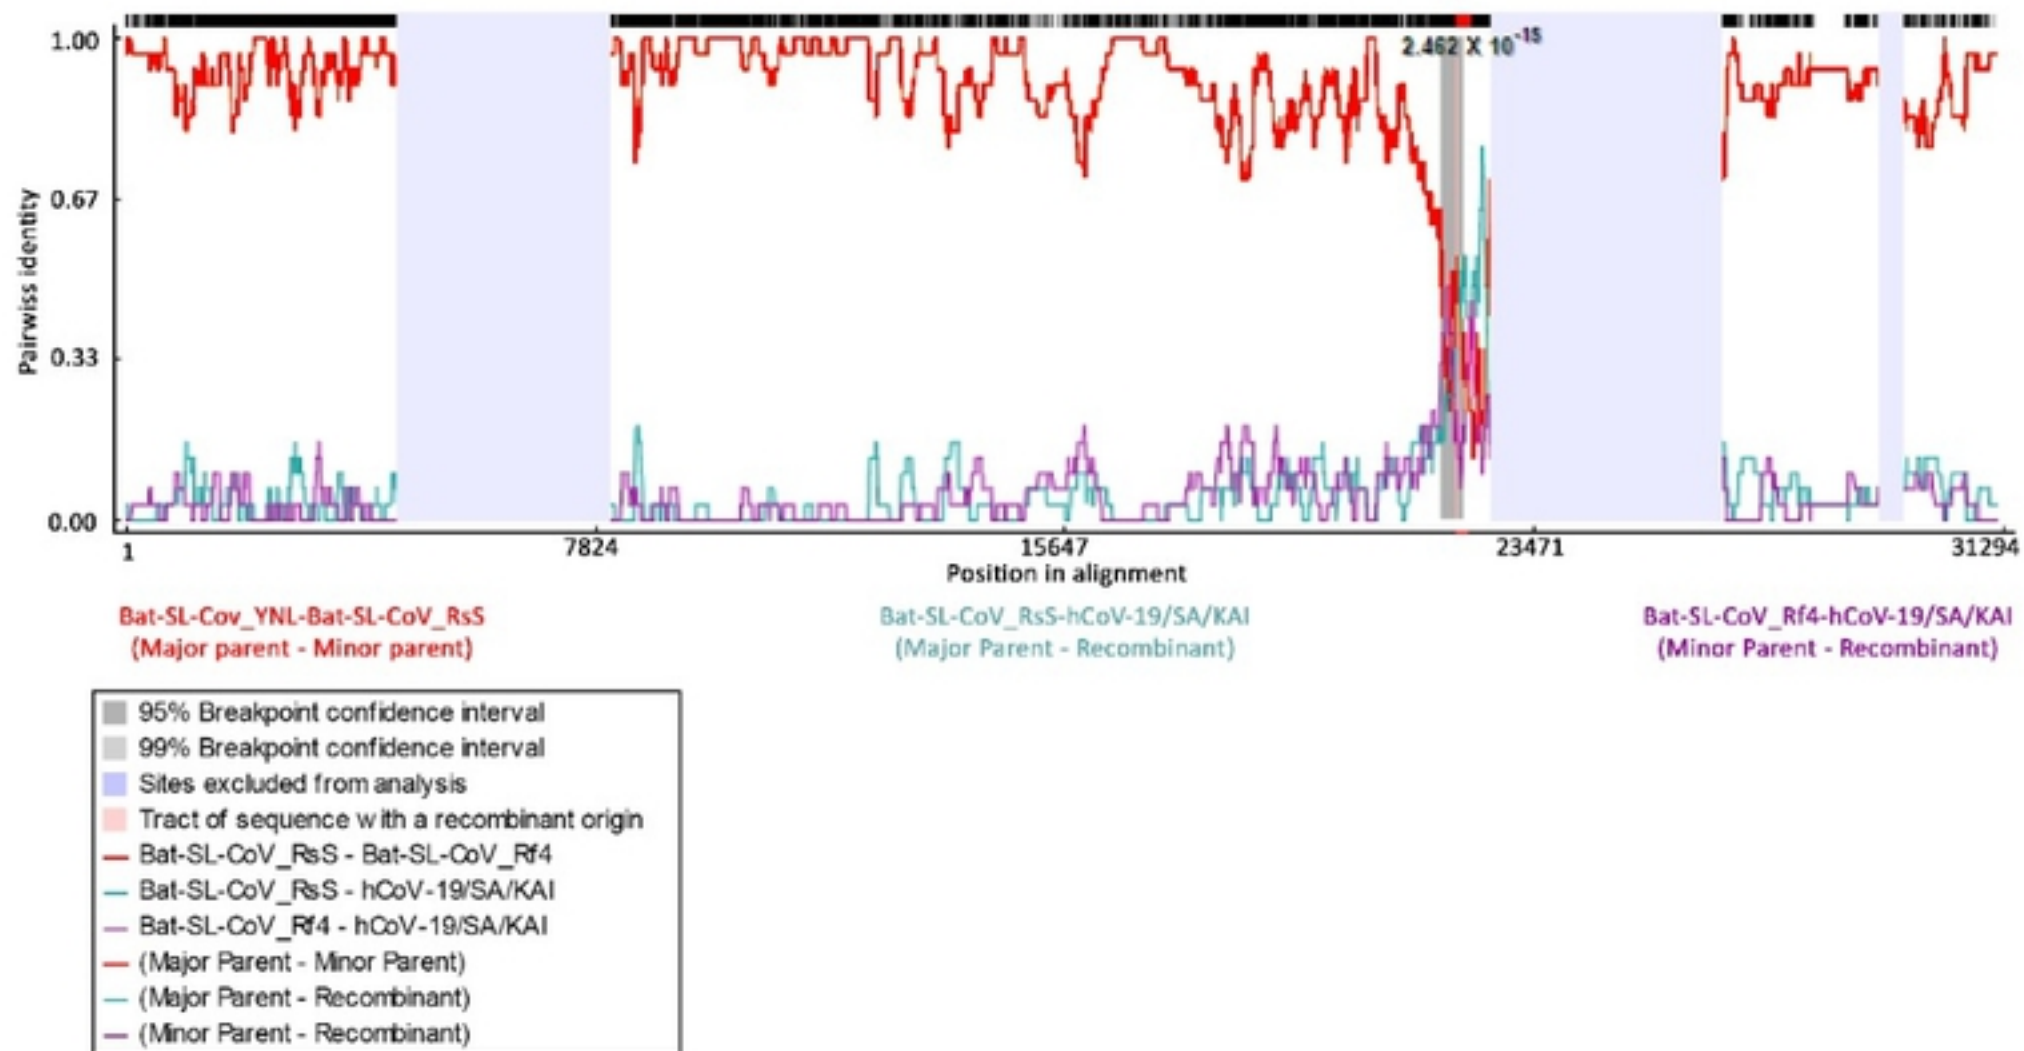

Fig 3

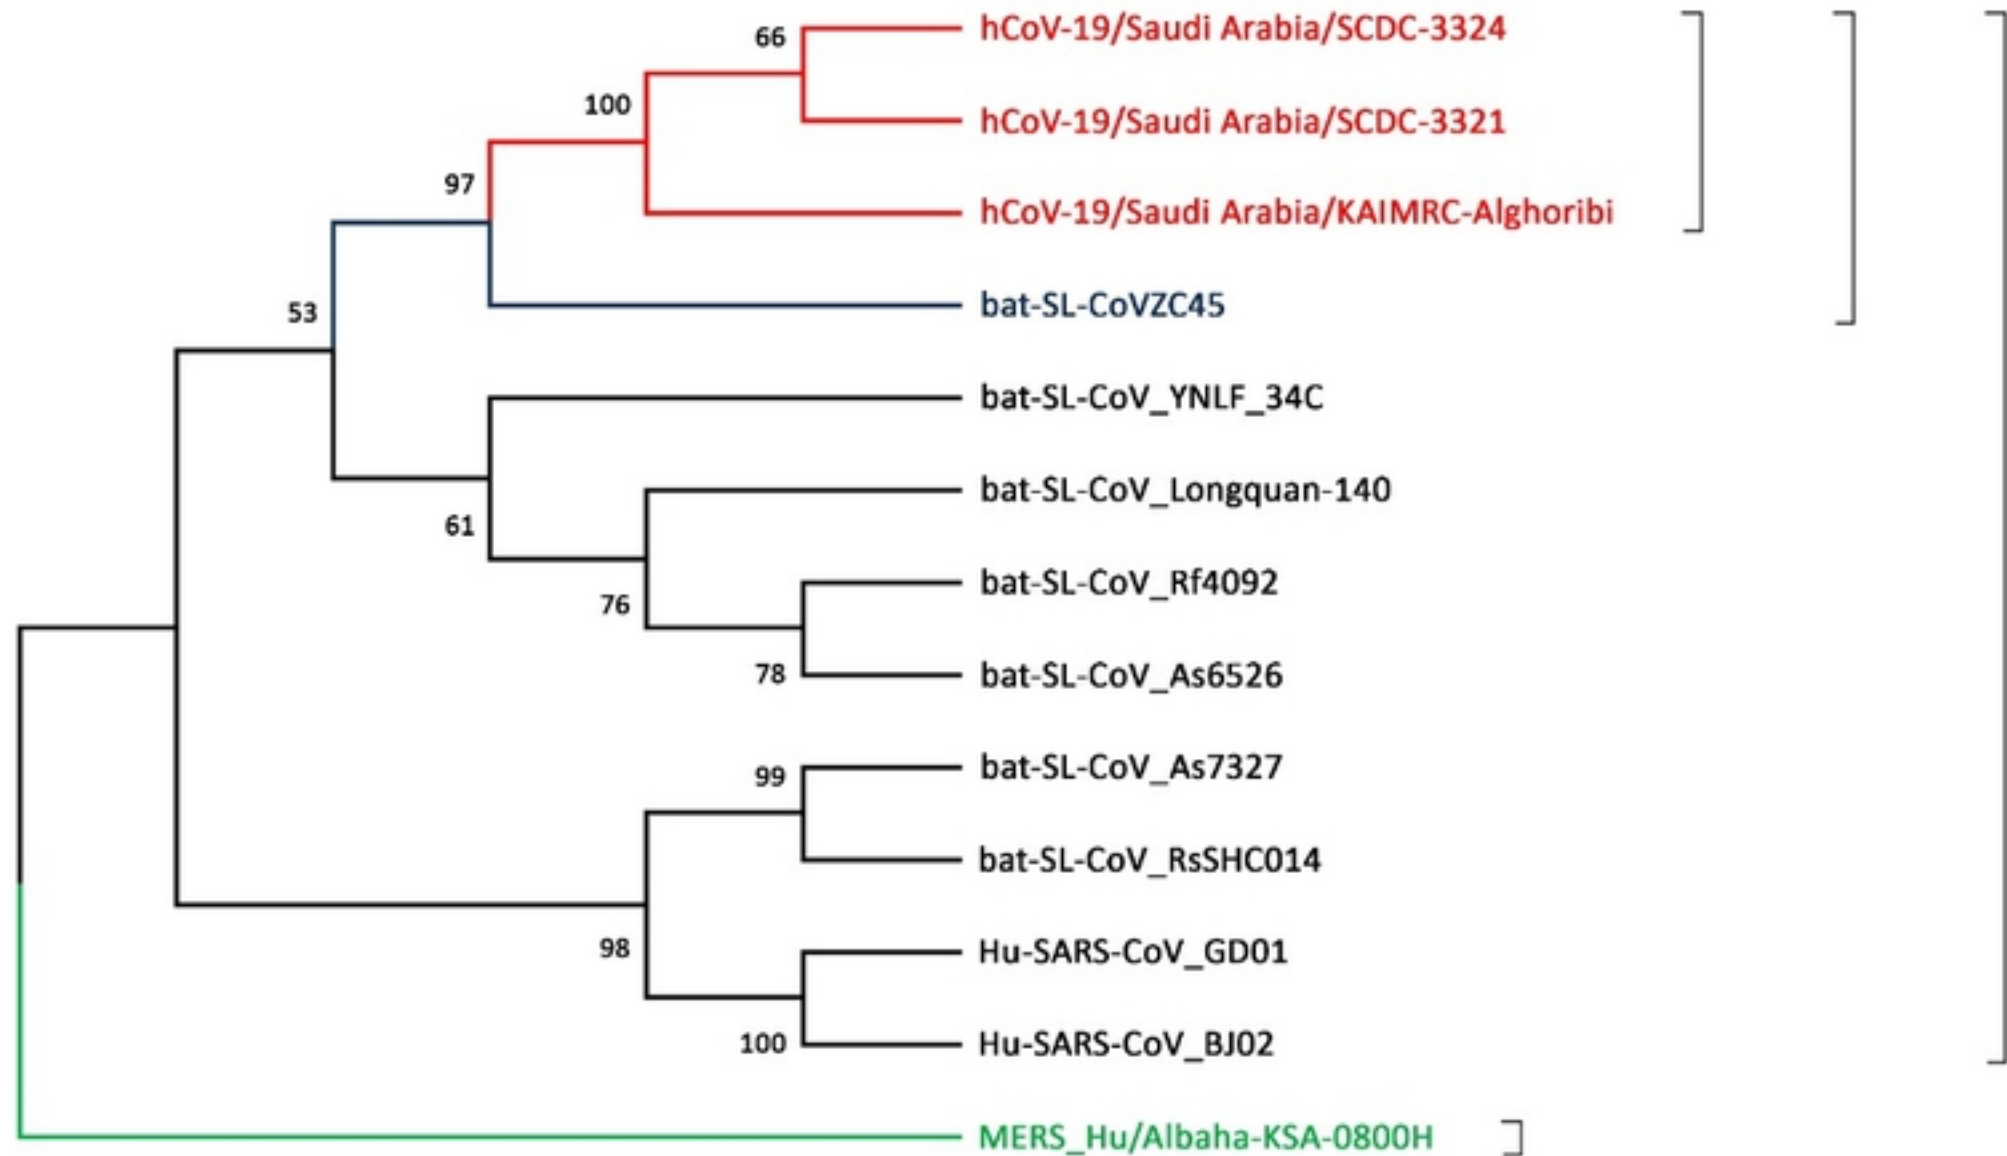

Fig 4



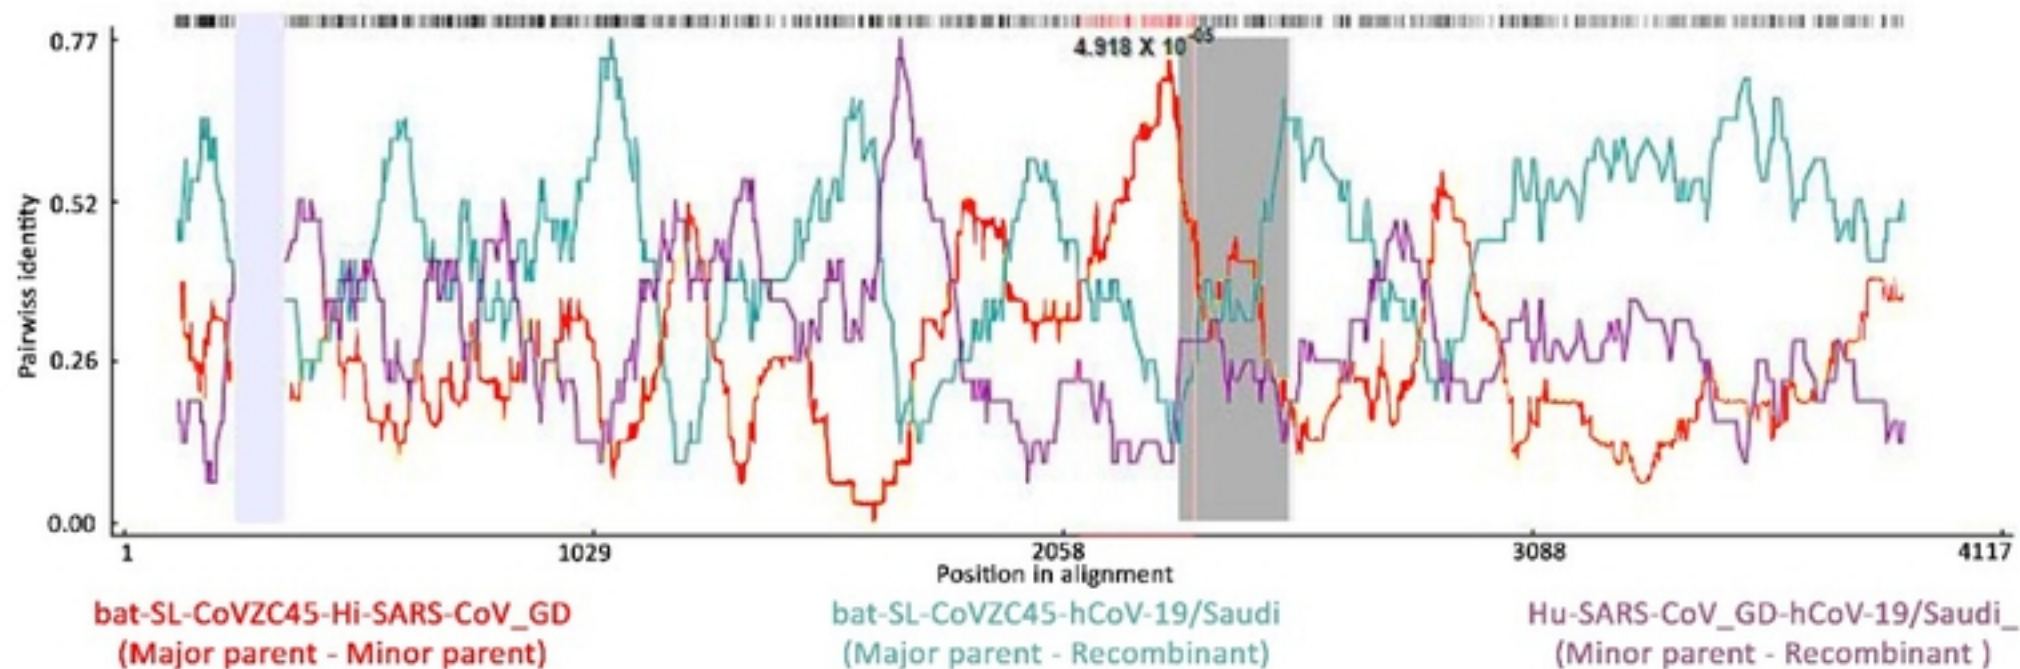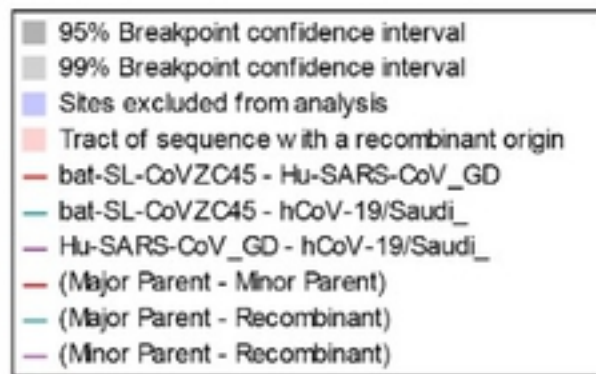

Fig 5
